# Supplementary material
Source: publisher site journal article supplement (https://www.dovepress.com/article/357998)
Supplement: Supplementary file 1 [file get_supplementary_file.php]

## **Supplementary materials**

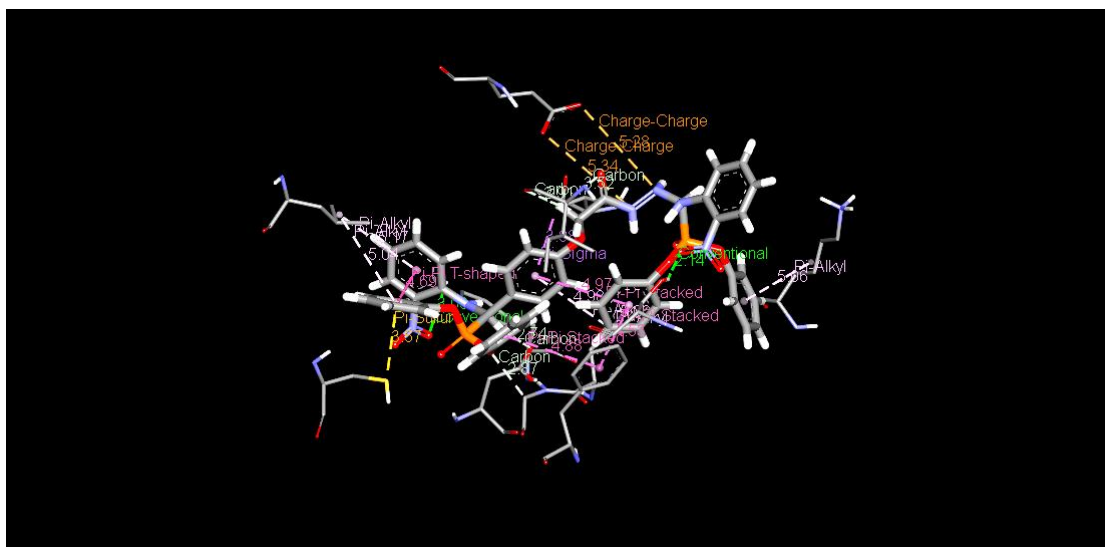

Compound 7b

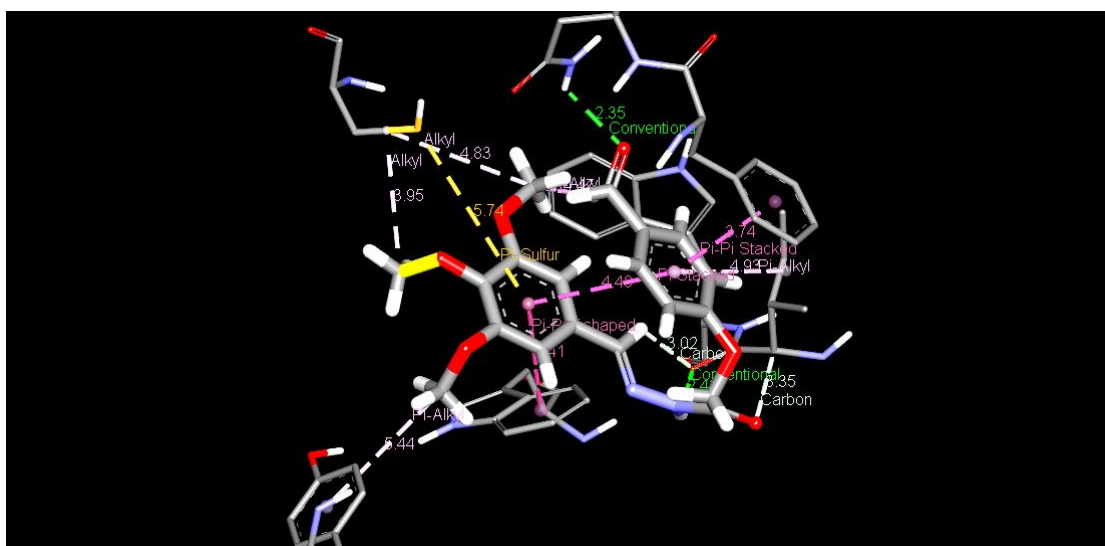

Compound 4c

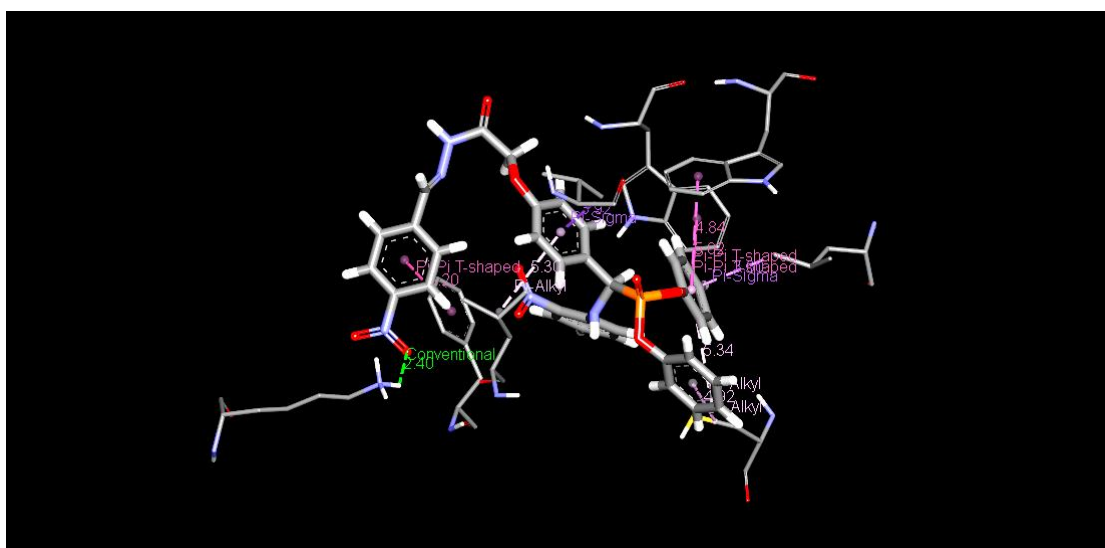







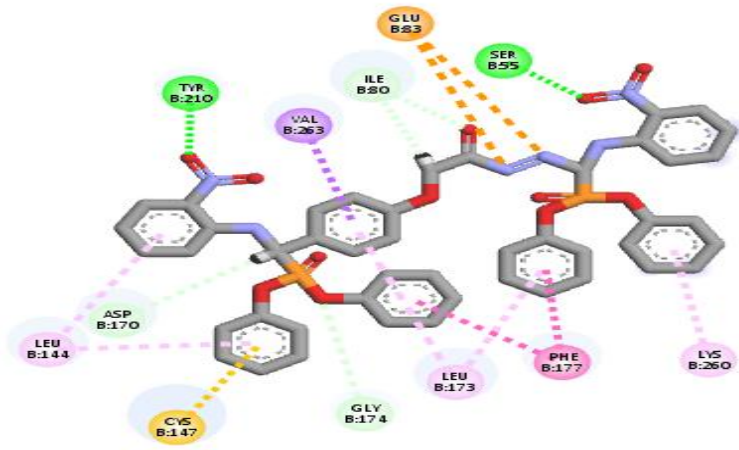

**Interactions**

- |                                                                                   |                            |                                                                                   |               |
|-----------------------------------------------------------------------------------|----------------------------|-----------------------------------------------------------------------------------|---------------|
|  | Attractive Charge          |  | Pi-Sulfur     |
|  | Conventional Hydrogen Bond |  | Pi-Pi Stacked |
|  | Carbon Hydrogen Bond       |  | Pi-Alkyl      |
|  | Pi-Sigma                   |                                                                                   |               |

**Compound 7b**

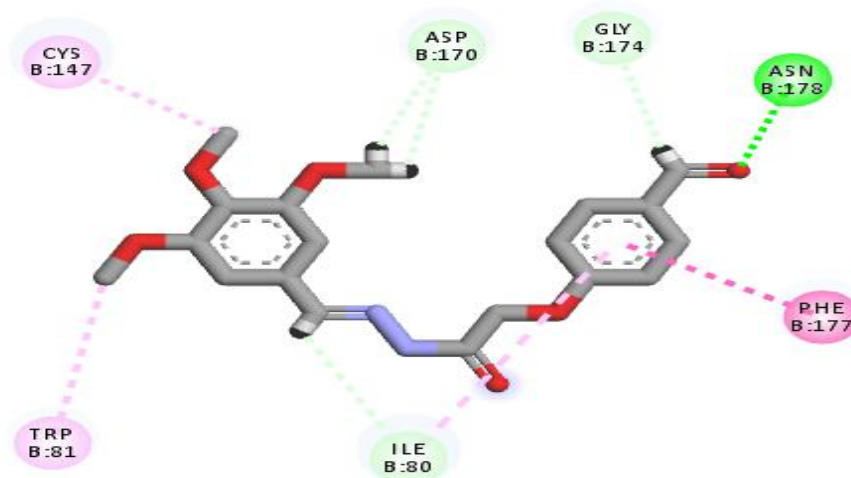

**Interactions**

- |                                                                                     |                            |                                                                                     |          |
|-------------------------------------------------------------------------------------|----------------------------|-------------------------------------------------------------------------------------|----------|
|  | Conventional Hydrogen Bond |  | Alkyl    |
|  | Carbon Hydrogen Bond       |  | Pi-Alkyl |
|  | Pi-Pi Stacked              |                                                                                     |          |

**Compound 4c**

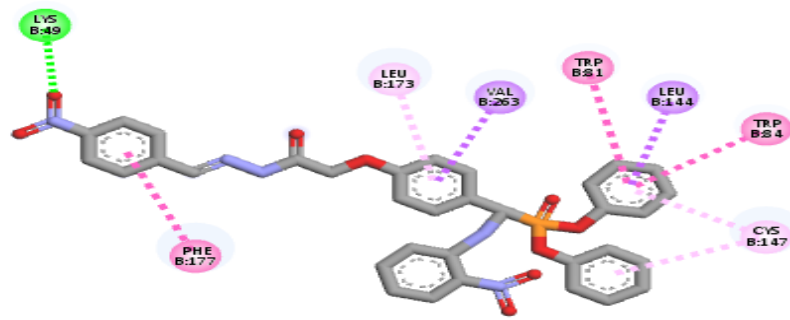

**Interactions**

 Conventional Hydrogen Bond  
 Pi-Sigma

 Pi-Pi T-shaped  
 Pi-Alkyl

Compound **5k**

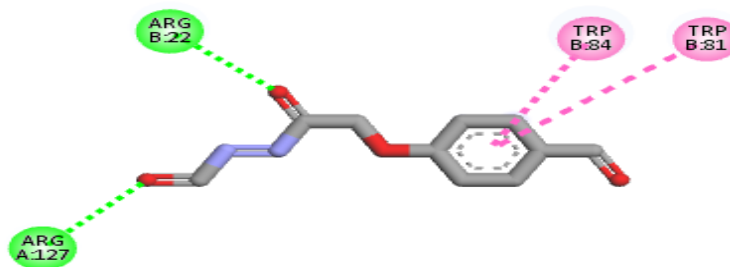

**Interactions**

 Conventional Hydrogen Bond  
 Pi-Pi Stacked

 Pi-Pi T-shaped

Compound **6**

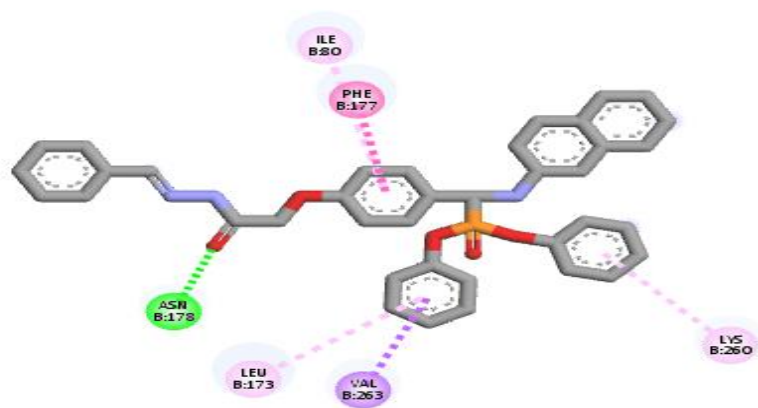

**Interactions**

■ Conventional Hydrogen Bond  
■ Pi-Sigma

■ Pi-Pi Stacked  
■ Pi-Alkyl

**Compound 5a**

Figure S3. Show the 2D interactions between (1AN5) and the studied compounds (**7b**, **4c**, **5k**, **6**, and **5a**, respectively).

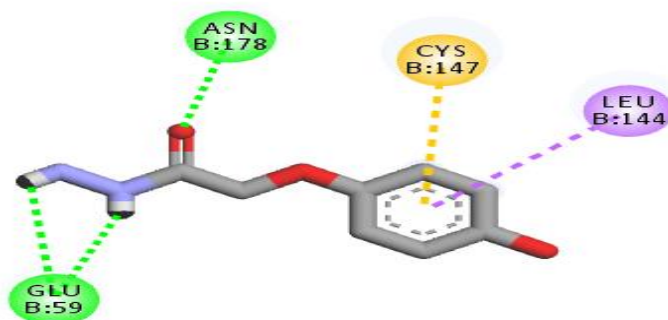

**Interactions**

■ Conventional Hydrogen Bond  
■ Pi-Sigma

■ Pi-Sulfur

**Compound 3**



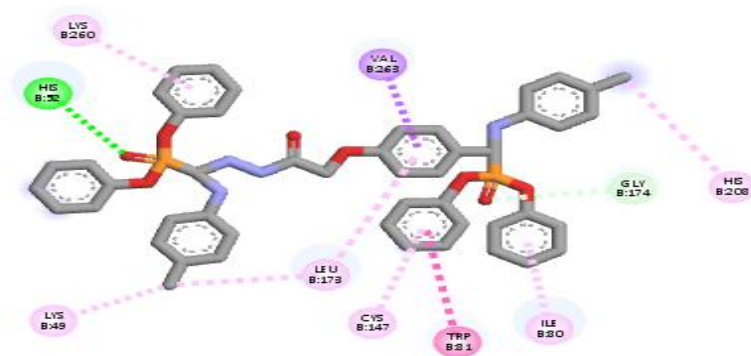

**Interactions**

- Conventional Hydrogen Bond
- Carbon Hydrogen Bond
- Pi-Sigma

- Pi-Pi T-shaped
- Alkyl
- Pi-Alkyl

Compound **7c**

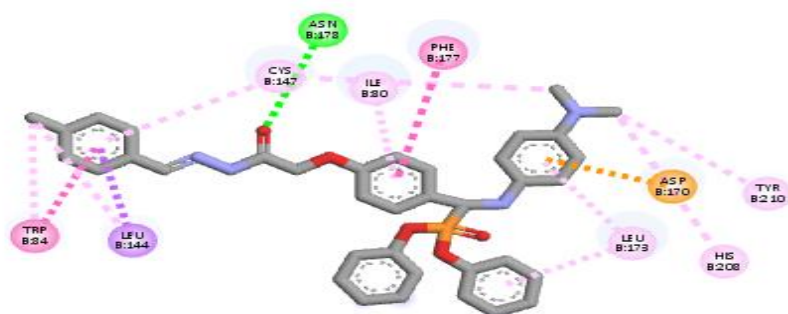

**Interactions**

- Conventional Hydrogen Bond
- Pi-Anion
- Pi-Sigma

- Pi-Pi T-shaped
- Alkyl
- Pi-Alkyl

Compound **5f**

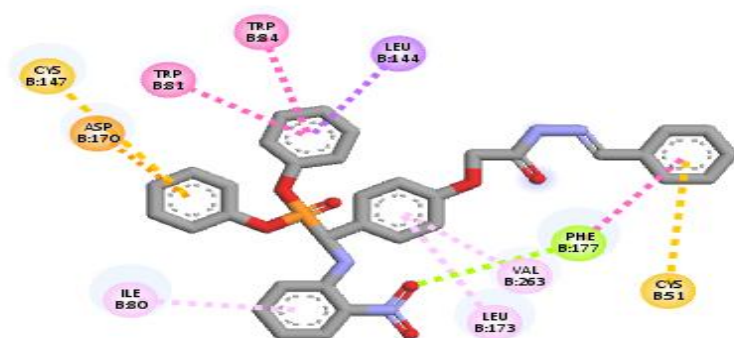

**Interactions**

- Pi-Anion
- Pi-Sigma
- Pi-Sulfur

- Pi-Lone Pair
- Pi-Pi T-shaped
- Pi-Alkyl

Compound **5b**

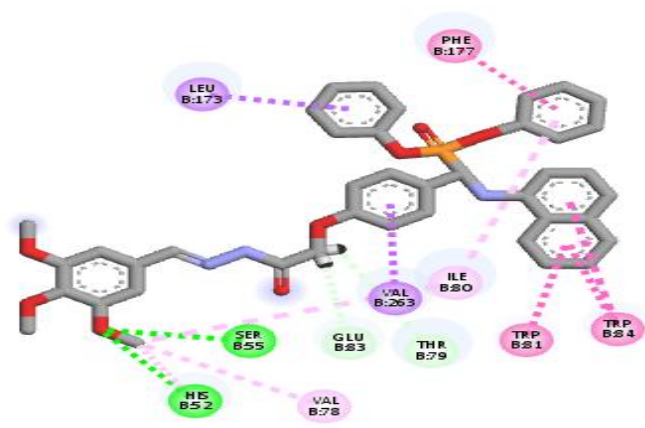

**Interactions**

- Conventional Hydrogen Bond
- Carbon Hydrogen Bond
- Pi-Sigma
- Pi-Pi Stacked
- Pi-Pi T-shaped
- Alkyl
- Pi-Alkyl

**Compound 5g**

Figure S4. Show the 2D interactions between (1AN5) and the studied compounds (**3**, **7c**, **5f**, **5b**, and **5g**, respectively).

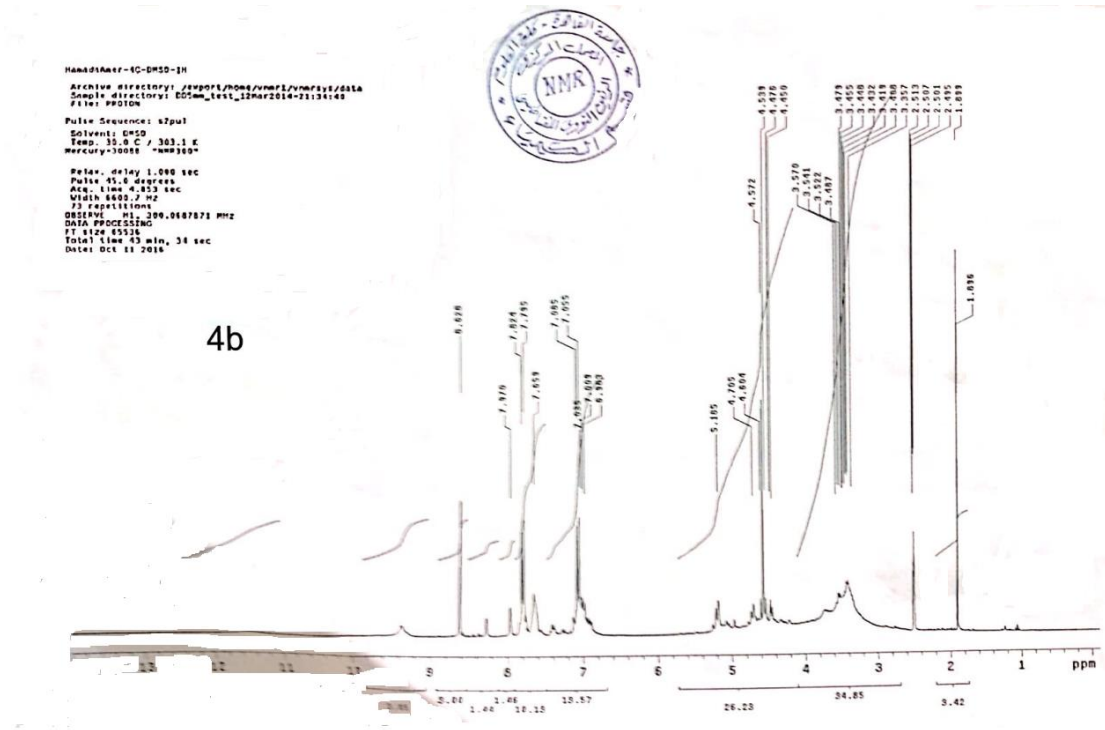

Figure S5. <sup>1</sup>H NMR spectrum of compound **4b**

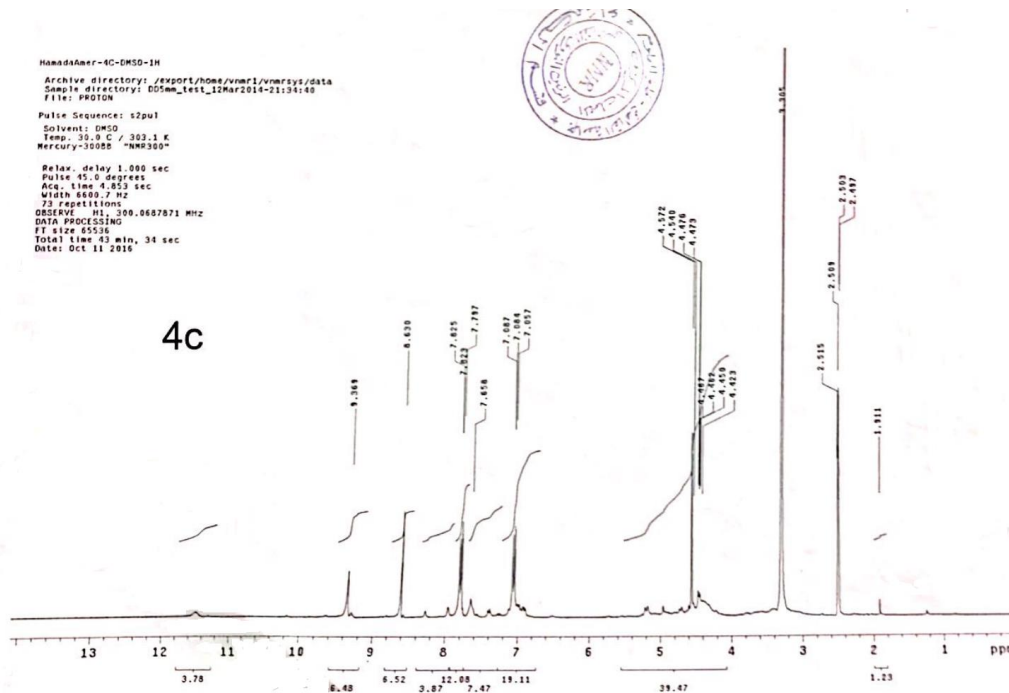

Figure S6. <sup>1</sup>H NMR spectrum of compound **4c**

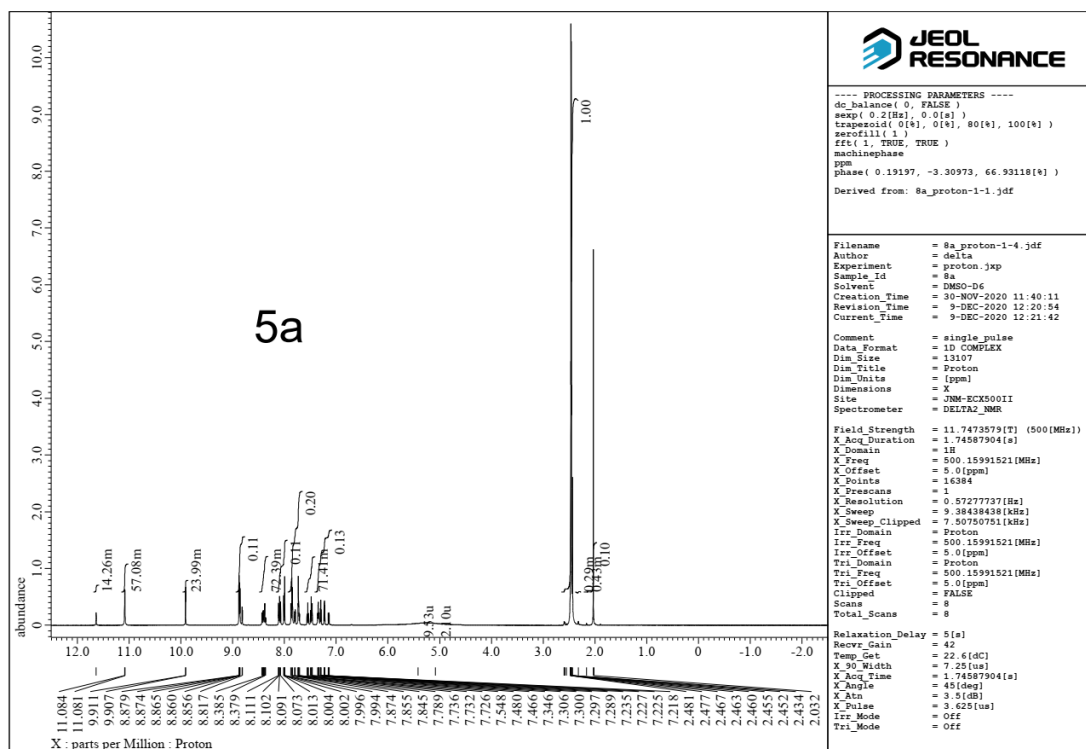

Figure S7. <sup>1</sup>H NMR spectrum of compound **5a**

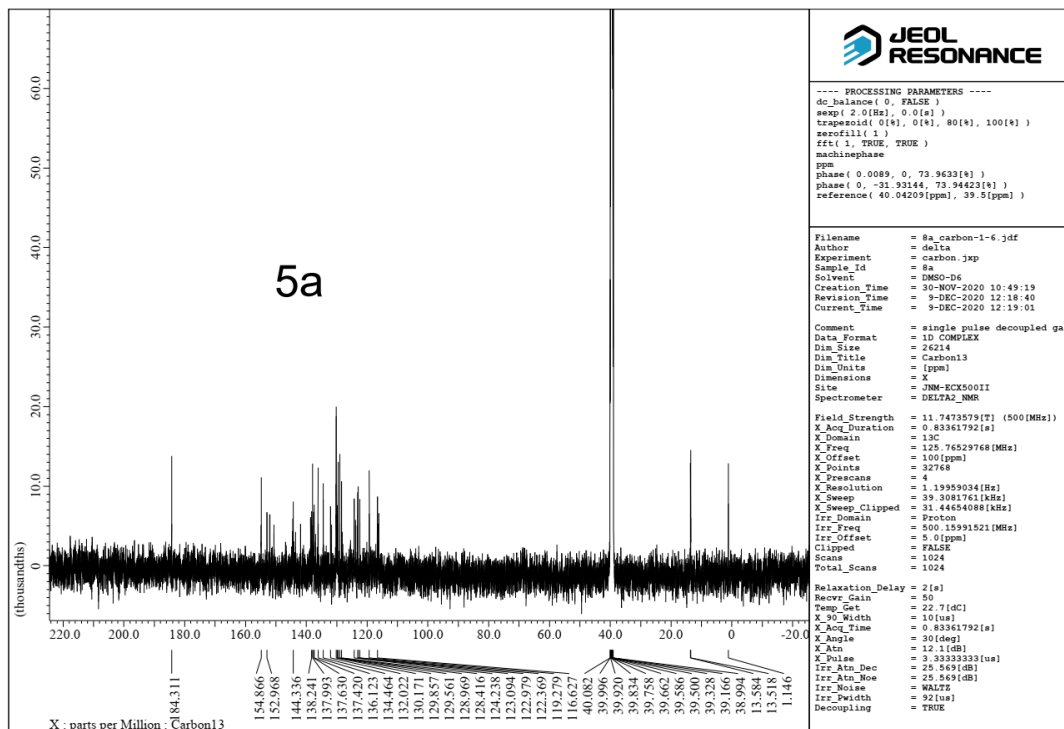

Figure S8.  $^{13}\text{C}$  NMR spectrum of compound **5a**

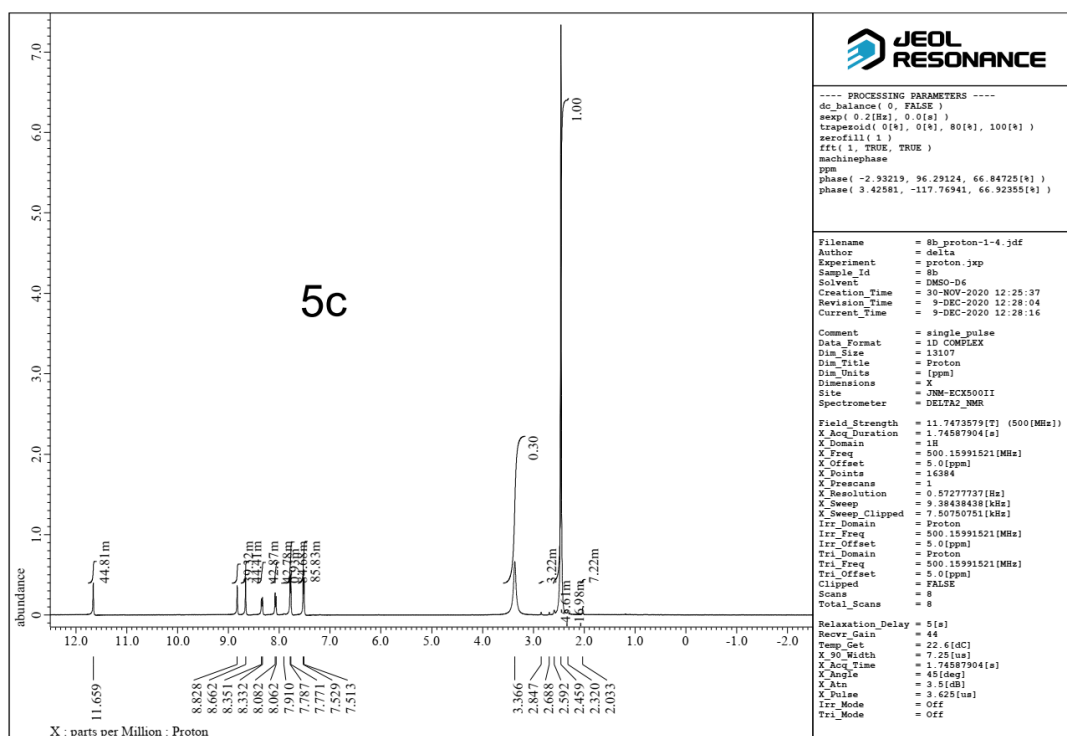

Figure S9.  $^1\text{H}$  NMR spectrum of compound **5c**

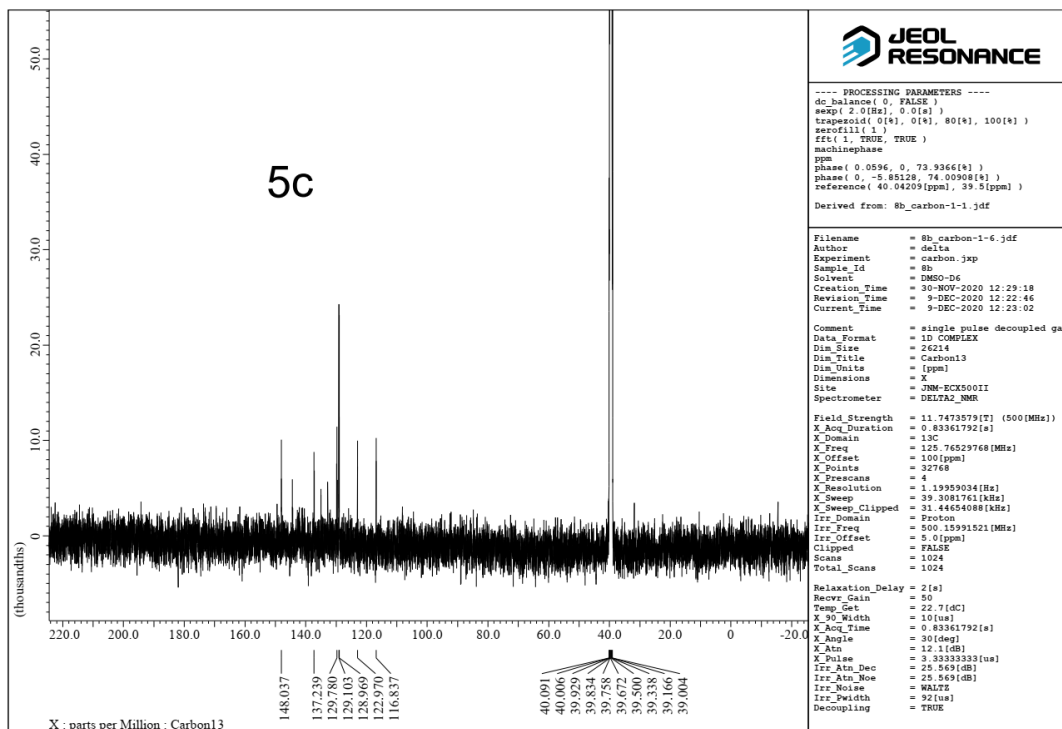

Figure S10.  $^{13}\text{C}$  NMR spectrum of compound **5c**

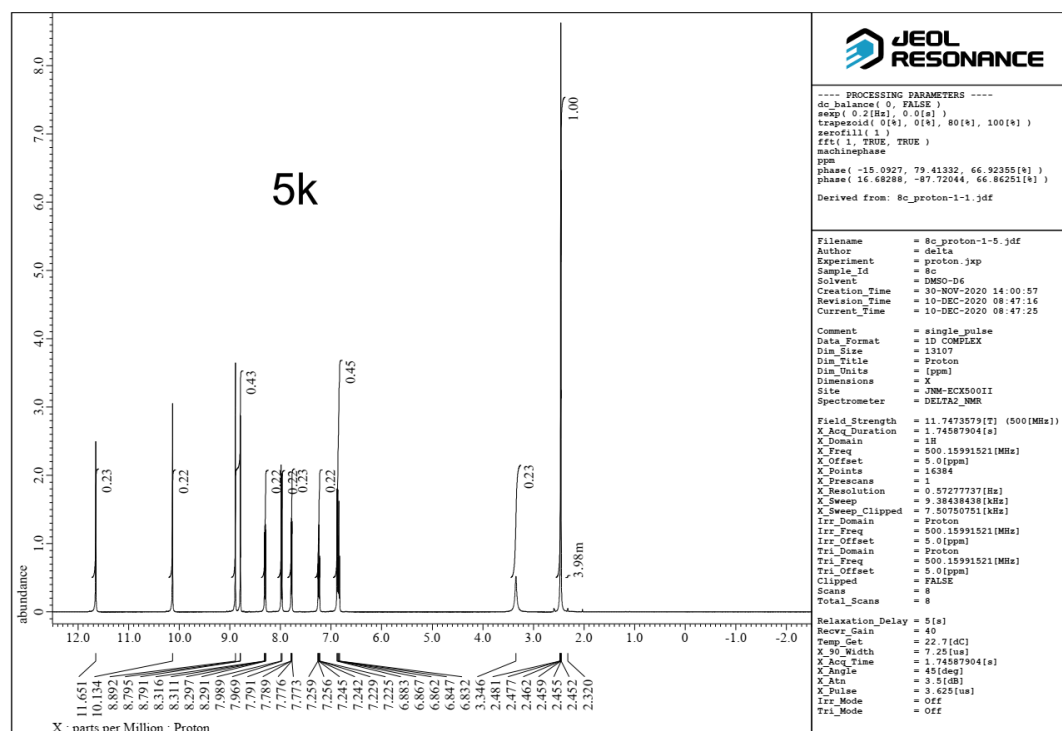

Figure S11.  $^1\text{H}$  NMR spectrum of compound **5k**

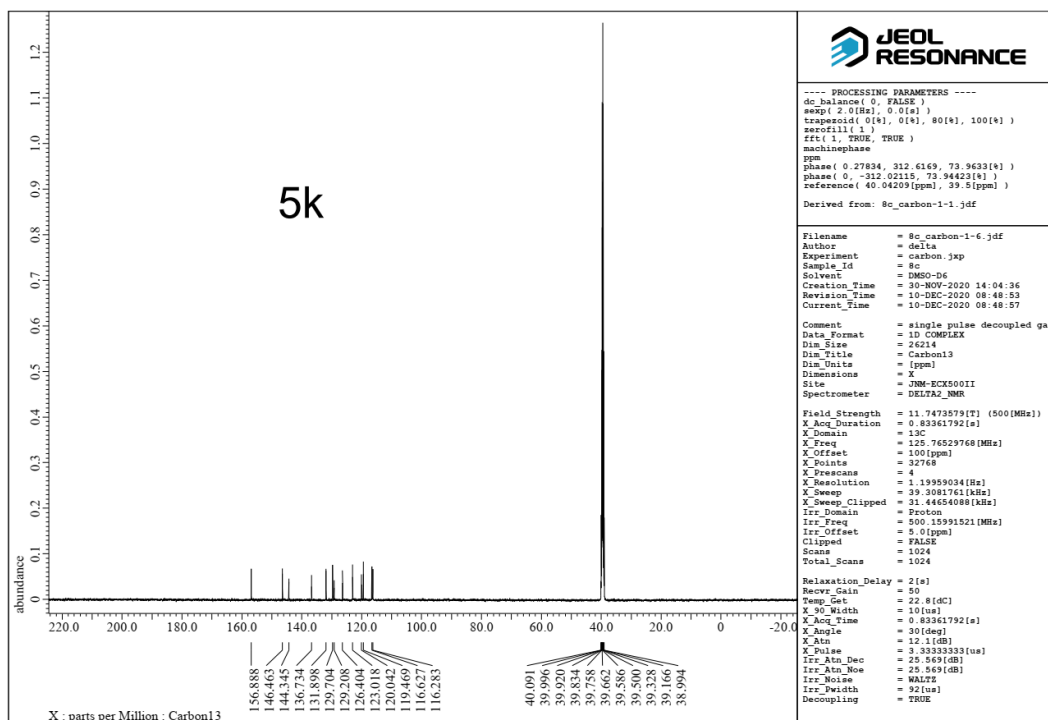

Figure S12.  $^{13}\text{C}$  NMR spectrum of compound **5k**

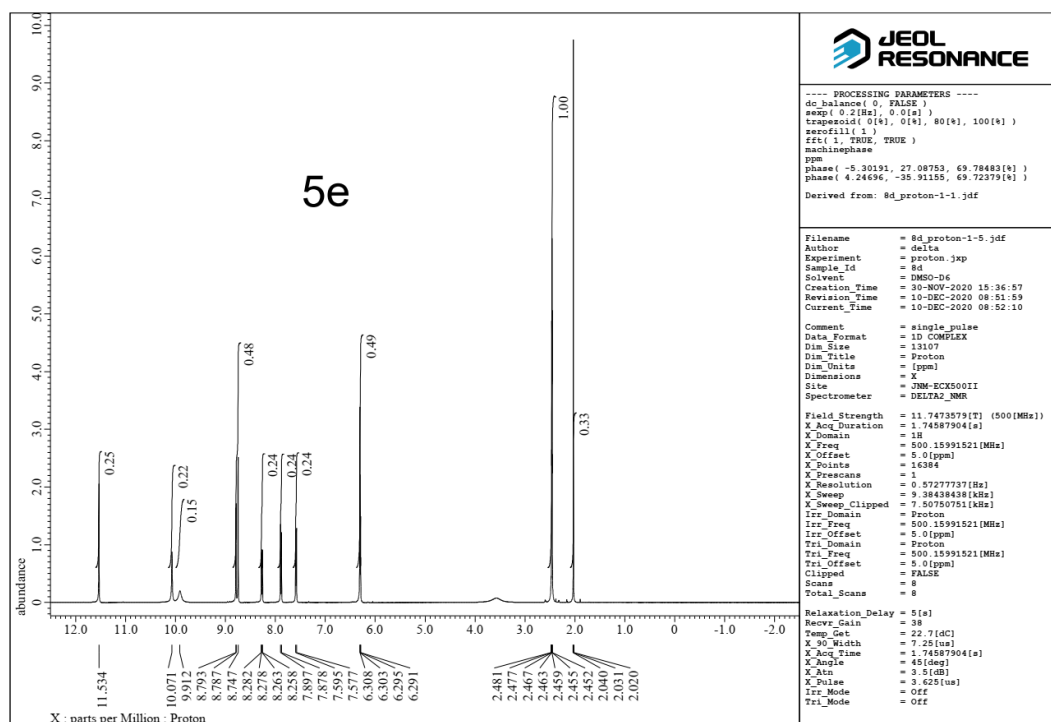

Figure S13.  $^1\text{H}$  NMR spectrum of compound **5e**

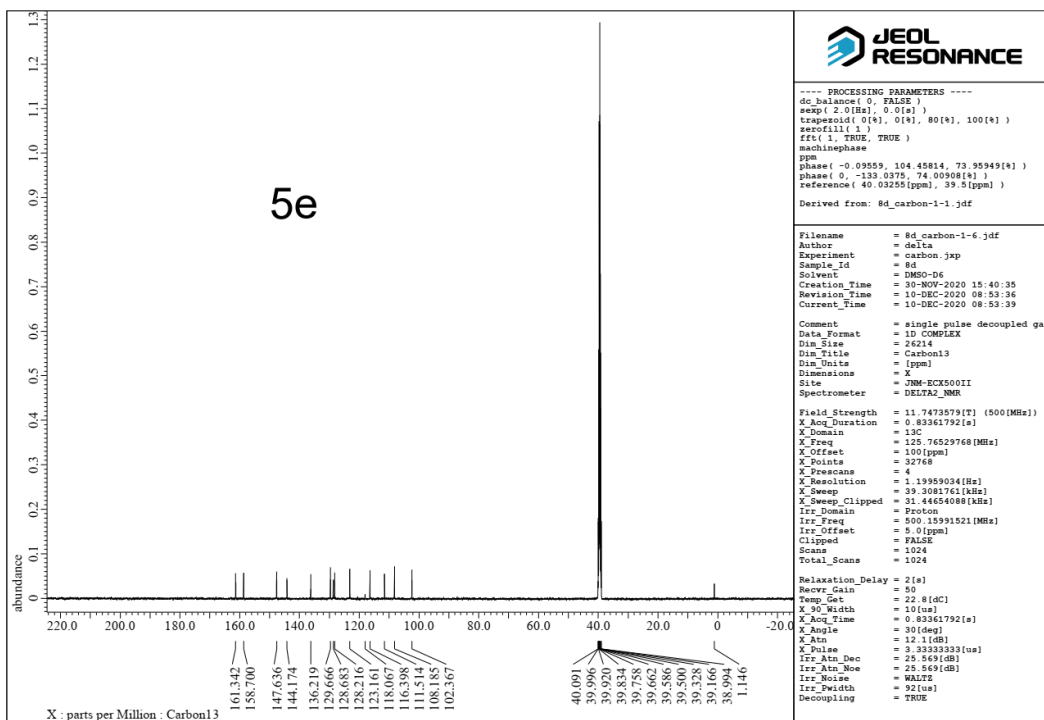

Figure S14.  $^{13}\text{C}$  NMR spectrum of compound **5e**

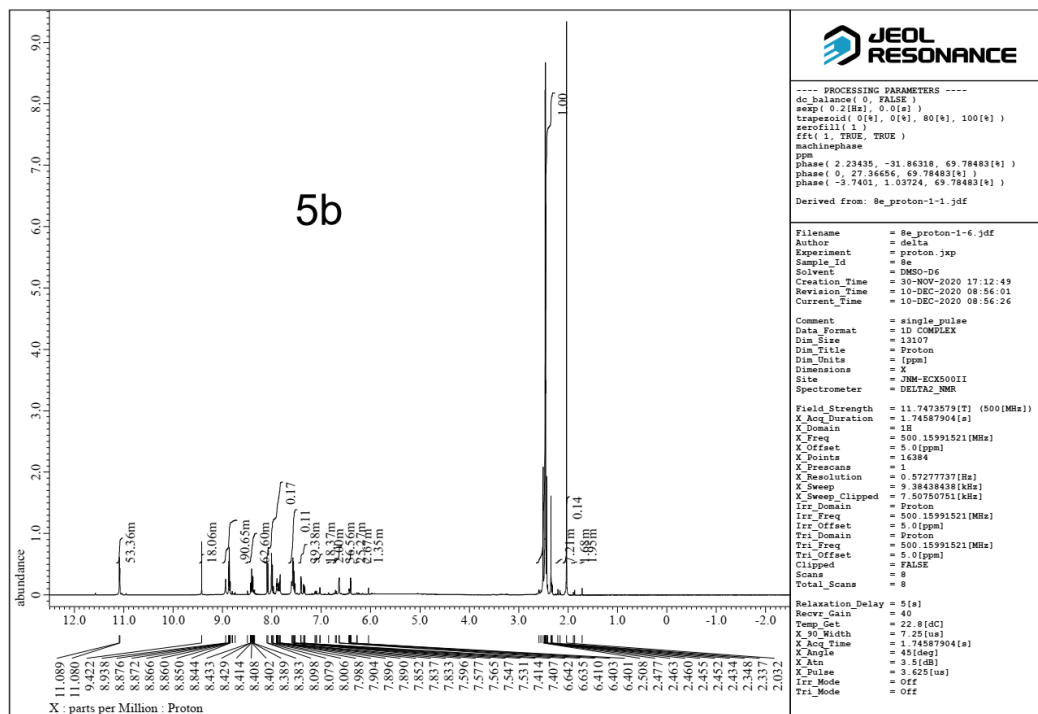

Figure S15.  $^1\text{H}$  NMR spectrum of compound **5b**



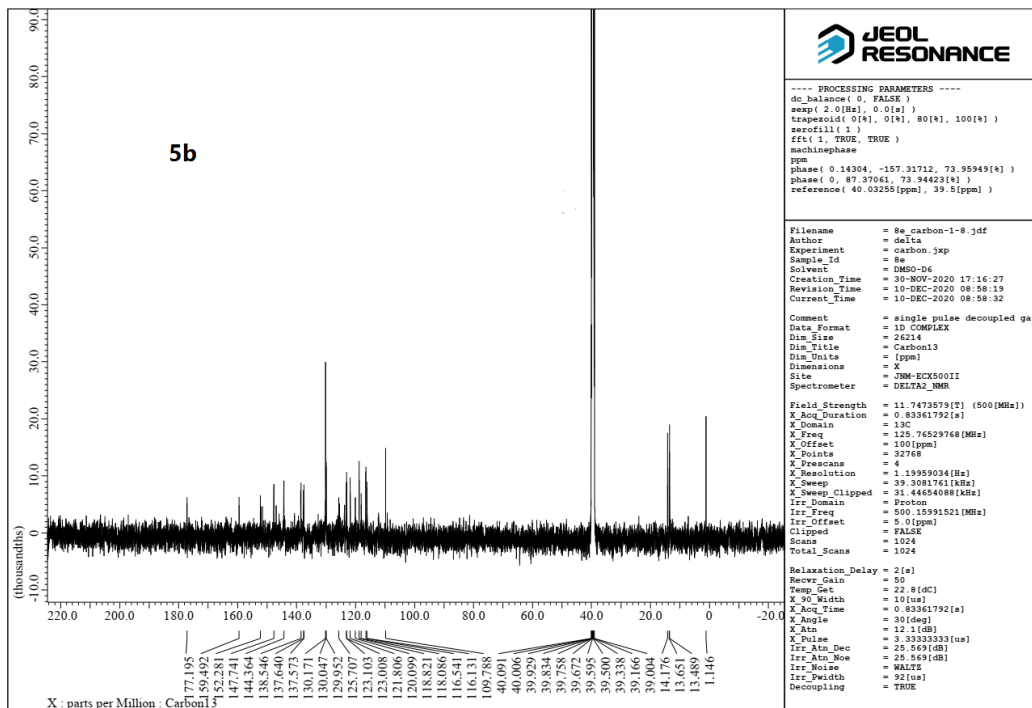

Figure S16.  $^{13}\text{C}$  NMR spectrum of compound **5b**

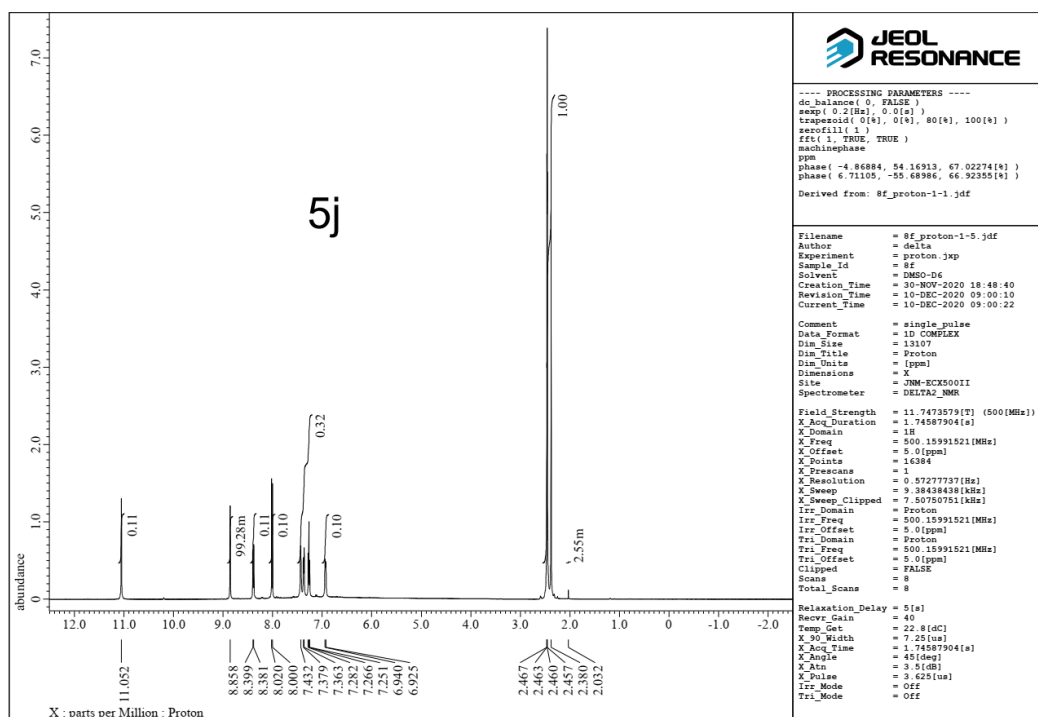

Figure S17.  $^1\text{H}$  NMR spectrum of compound **5j**



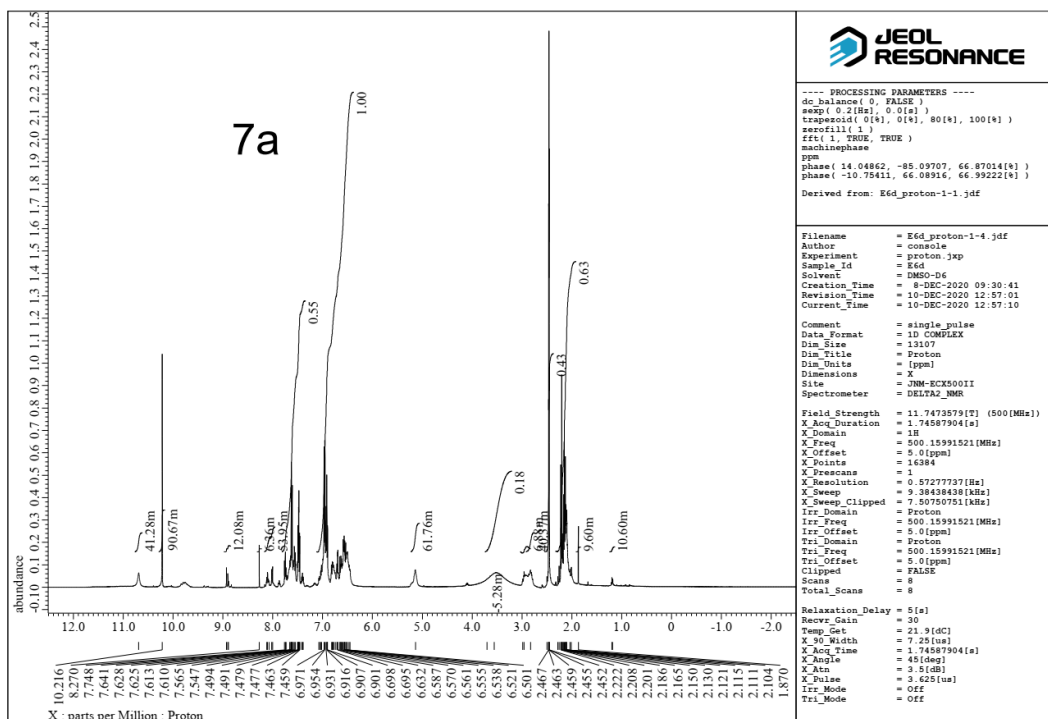

Figure S20.  $^1\text{H}$  NMR spectrum of compound **7a**

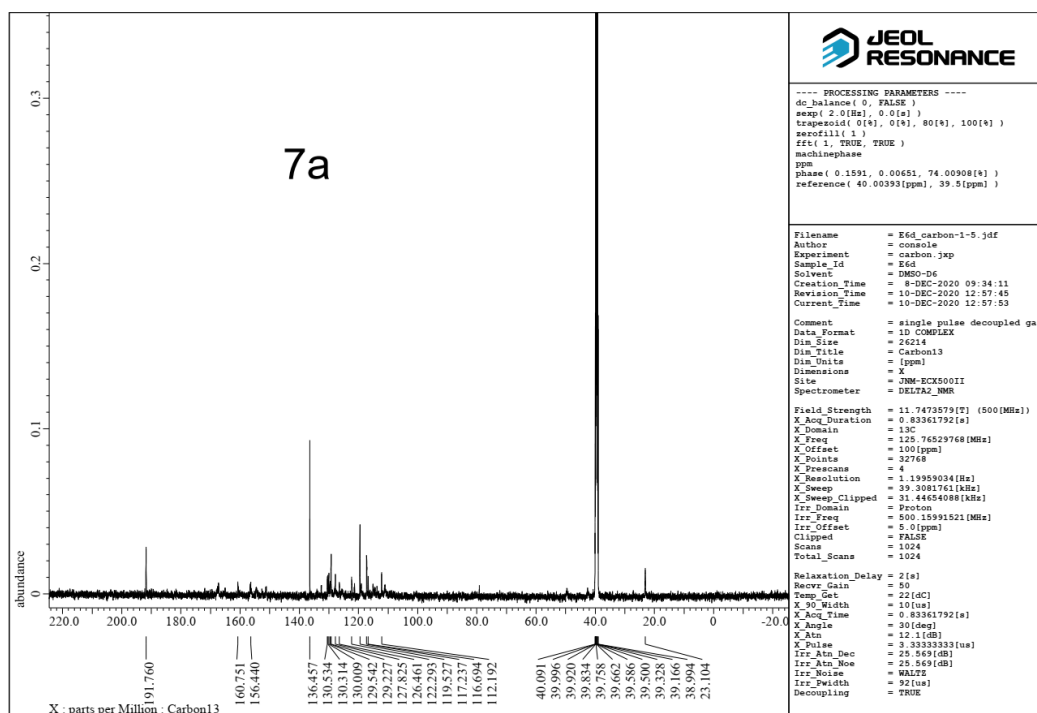

Figure S21.  $^{13}\text{C}$  NMR spectrum of compound **7a**



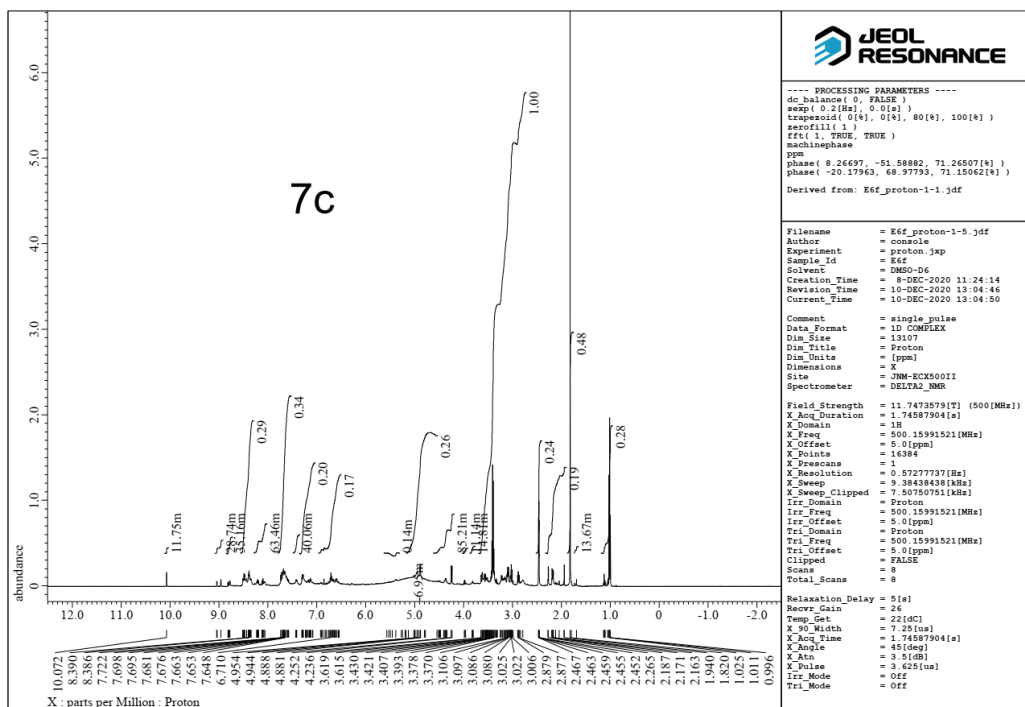

Figure S24.  $^1\text{H}$  NMR spectrum of compound **7c**

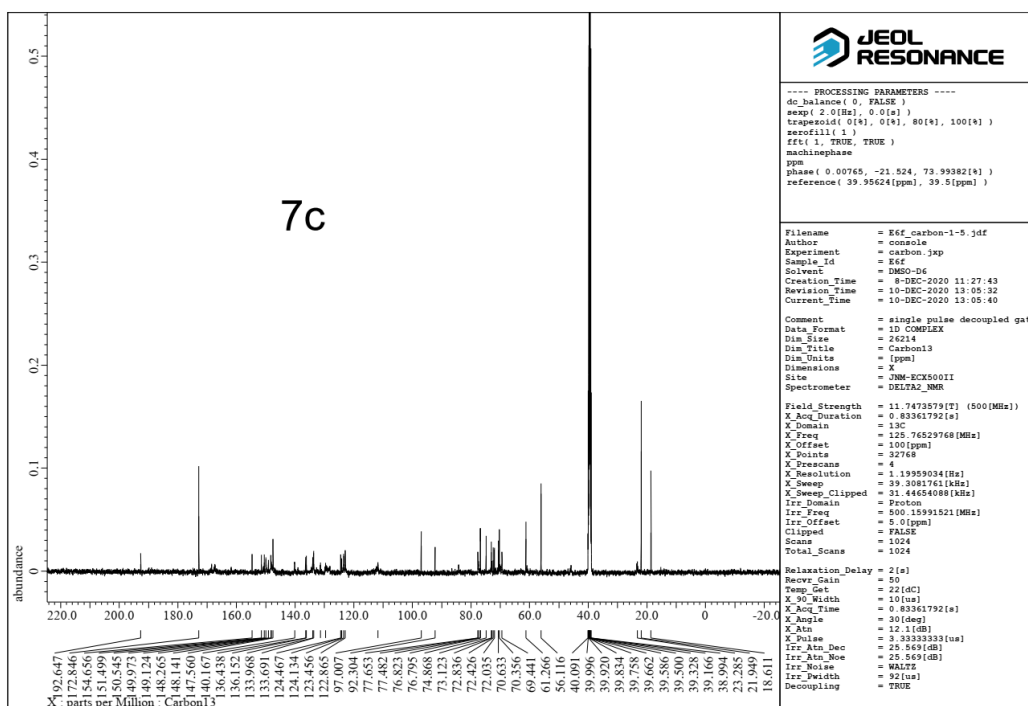

Figure S25.  $^{13}\text{C}$  NMR spectrum of compound **7c**

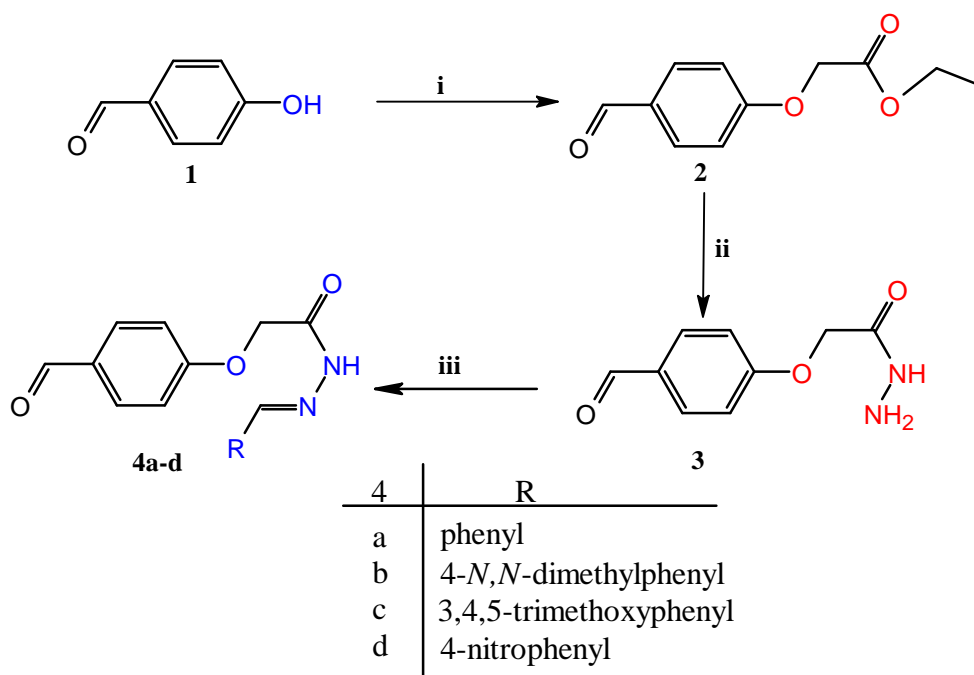

**Scheme 1.** Reagents conditions: (i) Ethylchloroacetate,  $\text{K}_2\text{CO}_3$ , acetone, reflux, 12h, 87%; (ii)  $\text{NH}_2\text{NH}_2 \cdot \text{H}_2\text{O}$ , EtOH, reflux, 5h, 90%; (iii) RCHO, EtOH, AcOH, reflux, 15h, for **4a**: 87%; for **4b**: 88%; for **4c**: 90%; for **4d**: 90%.

Synthesis of arylidene derivatives **4a-d**

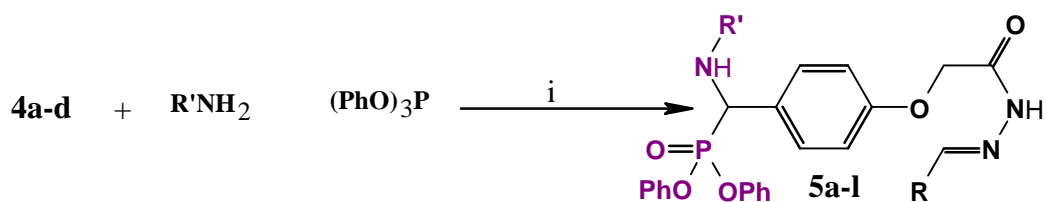

| 5 | R                       | R'             |
|---|-------------------------|----------------|
| a | phenyl                  | 1-naphthyl     |
| b | phenyl                  | 2-nitrophenyl  |
| c | phenyl                  | 4-methylphenyl |
| d | 4-(dimethylamino)phenyl | 1-naphthyl     |
| e | 4-(dimethylamino)phenyl | 2-nitrophenyl  |
| f | 4-(dimethylamino)phenyl | 4-methylphenyl |
| g | 3,4,5-trimethoxyphenyl  | 1-naphthyl     |
| h | 3,4,5-trimethoxyphenyl  | 2-nitrophenyl  |
| i | 3,4,5-trimethoxyphenyl  | 4-methylphenyl |
| j | 4-nitrophenyl           | 1-naphthyl     |
| k | 4-nitrophenyl           | 2-nitrophenyl  |
| l | 4-nitrophenyl           | 4-methylphenyl |

**Scheme 2.** Reagents conditions: (i)  $\text{HClO}_4$ , MeCN, r.t, 20h, for **5a**: 75%; for **5b**: 75%; for **5c**: 77%; for **5d**: 82%; for **5e**: 80%; for **5f**: 80%; for **5g**: 85%; for **5h**: 85%; for **5i**: 80%; for **5j**: 86%; for **5k**: 88%; for **5l**: 92%.

#### Synthesis of $\alpha$ -aminophosphonates **5a-l**

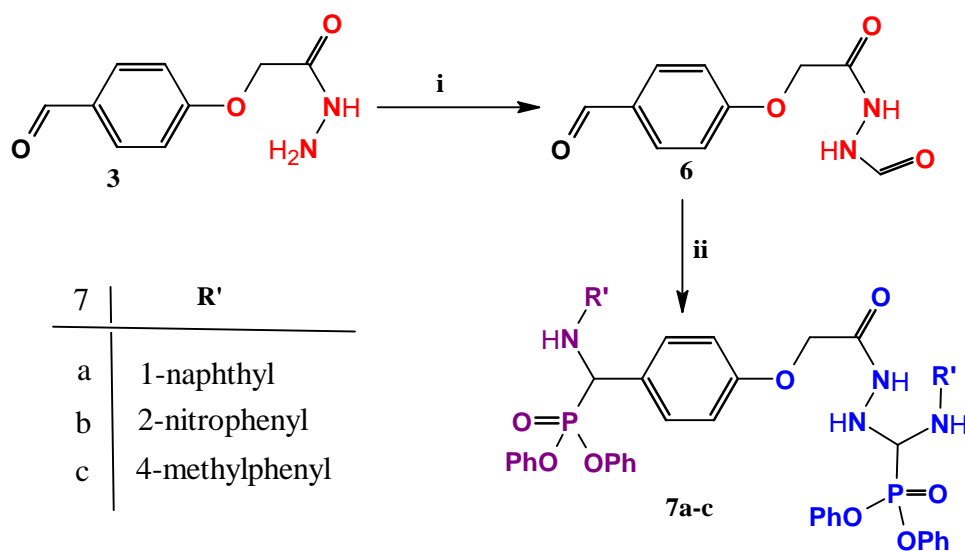

**Scheme 3.** Reagents conditions: (i)  $\text{HCOOH}$ , reflux, 14h, 90%; (ii)  $\text{R}'\text{NH}_2$ ,  $(\text{PhO})_3\text{P}$ ,  $\text{HClO}_4$ , MeCN, 24h, for **7a**: 85%; for **7b**: 87%; for **7c**: 88%.

#### Synthesis of phosphonates **7a-c**
